# Supplementary material for: Recombinant human thrombopoietin promotes hematopoietic reconstruction after severe whole body irradiation
Source: PubMed Central journal article supplement (PMC4585893; doi:10.1038/srep12993), 2015-09-25
Supplement: srep12993-s1.pdf [file srep12993-s1.pdf]

## Supplementary Information

### Recombinant human thrombopoietin promotes hematopoietic reconstruction after severe whole body irradiation

Chao Wang<sup>1,3\*</sup>, Bowen Zhang<sup>1,2\*</sup>, Sihan Wang<sup>1,2</sup>, Jing Zhang<sup>1,2</sup>, Yiming Liu<sup>1,2</sup>, Jingxue Wang<sup>1,2</sup>, Zeng Fan<sup>1,2</sup>, Yang Lv<sup>1,2</sup>, Xiuyuan Zhang<sup>1,2</sup>, Lijuan He<sup>1,2</sup>, Lin Chen<sup>1,2</sup>, Huanzhang Xia<sup>3\*\*</sup>, Yanhua Li<sup>1,2\*\*</sup>, Xuetao Pei<sup>1,2\*\*</sup>

<sup>1</sup>Stem Cell and Regenerative Medicine Lab, Beijing Institute of Transfusion Medicine, Beijing 100850, China, <sup>2</sup>South China Research Center for Stem Cell & Regenerative Medicine, AMMS, Guangzhou 510005, China, <sup>3</sup>School of Life Science and Bio Pharmaceutics, Shenyang Pharmaceutical University, Shenyang 110016, China.

\*These authors made an equal contribution.

\*\*Correspondence to Huanzhang Xia (xiahz612@sina.com), Yanhua Li (shirlylh@126.com) or Xuetao Pei (peixt@nic.bmi.ac.cn).

A

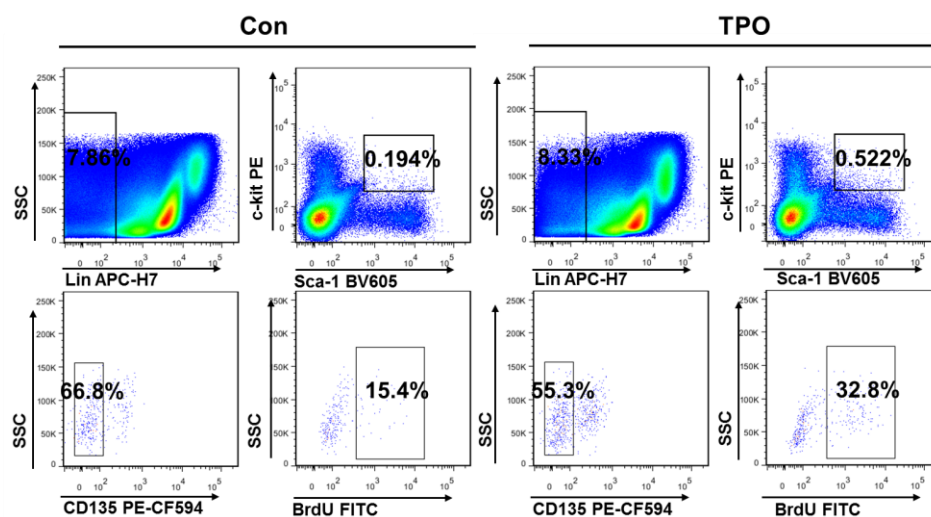

B

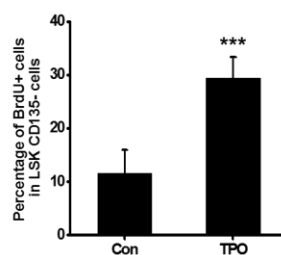

**Supplementary Figure Legend**

The BrdU incorporation frequency in the BM LSK CD135<sup>-</sup> cells was measured using flow cytometry.
